# Supplementary material for: Combining Co3S4 and Ni:Co3S4 nanowires as efficient catalysts for overall water splitting: an experimental and theoretical study
Source: Royal Society of Chemistry journal article supplement (doi:10.1039/c8nr07787h), 2018-12-11
Supplement: c8nr07787h1.pdf [file c8nr07787h1.pdf]

Supporting Information for

**Combining  $\text{Co}_3\text{S}_4$  and  $\text{Ni:Co}_3\text{S}_4$  nanowires as efficient catalysts for overall water splitting: an experimental and theoretical study**

Shasha Tang,<sup>1</sup> Xing Wang,<sup>2</sup> Yongqi Zhang,<sup>1</sup> Marc Courté,<sup>1</sup> Hong Jin Fan,<sup>1</sup> and Denis Fichou.<sup>1,3\*</sup>

<sup>1</sup> School of Physical and Mathematical Sciences, Nanyang Technological University, 637371, Singapore

<sup>2</sup> Institute for Chemical and Bioengineering, ETH Zurich, Vladimir Prelog Weg 1, 8093 Zurich, Switzerland

<sup>3</sup> Sorbonne Université, CNRS, Institut Parisien de Chimie Moléculaire (UMR 8232), 4 place Jussieu, 75005 Paris, France.

\*Corresponding Author: E-mail: [denisfichou@ntu.edu.sg](mailto:denisfichou@ntu.edu.sg)

## 1. Experimental Section

### a. *Synthesis of Cobalt-based Materials*

The  $\text{Co}_3\text{O}_4$  nanowire was synthesized on commercial nickel foam by hydrothermal method. A piece of pressed Ni foam was sonication cleaned with de-ionized water and ethanol. Polytetrafluoroethylene tape was utilized to protect the backside of Ni foam from solution contamination. Afterward, the Ni foam was immersed in Teflon liners containing 60 mL de-ionized water of 2 mmol cobalt nitrate, 4 mmol ammonium fluoride, 10 mmol urea. Then, the Teflon liners were put in the stainless steel autoclave and maintained at  $120^\circ\text{C}$  for 4 hours. After hydrothermal reaction, the sample was rinsed with de-ionized water and ethanol several times. The dark grey Ni foam turned pink, suggesting the formation of cobalt-based material. Subsequently, the sample was annealed at  $300^\circ\text{C}$  for 1 hour in air. This turned the pink Ni foam black, suggesting the conversion from cobalt-based precursor to  $\text{Co}_3\text{O}_4$ . The average mass loading of  $\text{Co}_3\text{O}_4$  is  $2.5 \text{ mg cm}^{-2}$ .

To synthesize  $\text{Co}_3\text{S}_4$ , the above  $\text{Co}_3\text{O}_4$  sample underwent an ion exchange reaction in another hydrothermal treatment. The backside of the above sample was again covered with polytetrafluoroethylene tape and then sealed in Teflon-lined stainless steel autoclave liners containing 60 mL of deionized water of 300 mg  $\text{Na}_2\text{S}\cdot 6\text{H}_2\text{O}$ . The autoclave was heated at  $160^\circ\text{C}$  for 6 hours. After cooling down naturally, the sample was rinsed several times with deionized water and ethanol.

To obtain nickel doped cobalt-based materials, 0.1 mmol nickel nitrate was added in the first hydrothermal process. Other heat treatment and sulfurization process were the same as above. Also, we collected the precipitated pink powders after the first hydrothermal reaction and washed them with de-ionized water and ethanol by centrifugation. After drying at  $60^\circ\text{C}$  for 5 hours, the powder sample was annealed under above conditions and collected as  $\text{Ni}:\text{Co}_3\text{O}_4$  powder. After drying at  $60^\circ\text{C}$  for 5 hours, the powders were annealed at  $300^\circ\text{C}$  for 1 hour in air. Then, these  $\text{Ni}:\text{Co}_3\text{O}_4$  powders were converted to  $\text{Ni}:\text{Co}_3\text{S}_4$  under the similar ion exchange condition as above. The  $\text{Ni}:\text{Co}_3\text{O}_4$  and  $\text{Ni}:\text{Co}_3\text{S}_4$  powders are completely dissolved in pure nitrate acid and used to perform the ICP-OES characterizations.

### *b. Material Characterization*

The morphology and size of cobalt-based materials were characterized using field emission scanning electron microscopy (FESEM, FEI SIRION) and transmission electron microscopy (TEM, JEOL-2010 HR & UHR and JEOL-2100F with UHR Configuration). The chemical composition of cobalt-based materials was confirmed by X-ray diffraction (XRD, 6000 Shimadzu) and a Thermo Fischer iCAP 6000 series inductively coupled plasma optical emission spectrometer (ICP-OES). The chemical valence states of cobalt-based sulfide materials were detected by X-ray photoelectron spectroscopy (XPS, PHI 5700).

### *c. Electrochemical Characterization*

Electrochemical testing was conducted in a three-electrode glass configuration via a Zahner-Zennium electrochemical workstation. The samples grown on Ni foam were used as working electrodes, a platinum foil/carbon rod as the counter electrode, and an Ag/AgCl (3.0 M KCl) electrode as the reference. All electrodes were immersed into the 1 M KOH electrolyte, and the electrolyte was bubbled with high purity O<sub>2</sub> gas for 15 min before the test. All the tests were conducted at room temperature. Before any measurements were performed, cyclic voltammetry from 0 to 0.8 V at 50 mV s<sup>-1</sup> were carried out 20 cycles, which is an activation process to stabilize the current and detach any impurity formed on the surface of the electrode. Then, the linear sweep voltammetry (LSV) tests were performed at 2 mV s<sup>-1</sup> for the polarization curves. All data were dealt with iR-compensation by the current-interrupt method. The main point of this method is to consider uncompensated cell resistance (R). Generally, the obtained potential is corrected by subtracting ohmic drop (iR), where i is the current related to the potential. Tafel plots were derived from the above LSV curves by fitting the data to the equation  $\eta = a + b \log(j)$ , where  $\eta$  is the iR-compensated overpotential,  $a$  is the Tafel constant,  $b$  is the Tafel slope, and  $j$  is the current density. The stability was investigated at fixed current densities (10, 30, and 50 mA cm<sup>-2</sup>) by chronopotentiometry. The current density was calculated based on the geometric area of the electrode. The Faradaic efficiency was estimated using the volumetric method. In all measurements, Ag/AgCl (3.0 M KCl) electrode was used as the reference, which has the potential of 0.210 V vs. RHE. Potentials obtained in this study were calibrated against the reversible

hydrogen electrode (RHE) reference by the following equation:  $E$  (V vs. RHE) =  $E$  (V vs. Ag/AgCl) + 0.059 pH +  $E$  (Ag/AgCl vs. RHE). In our study,  $\eta_{10}$  is the iR-compensated overpotential which can achieve a current density of 10 mA cm<sup>-2</sup>.

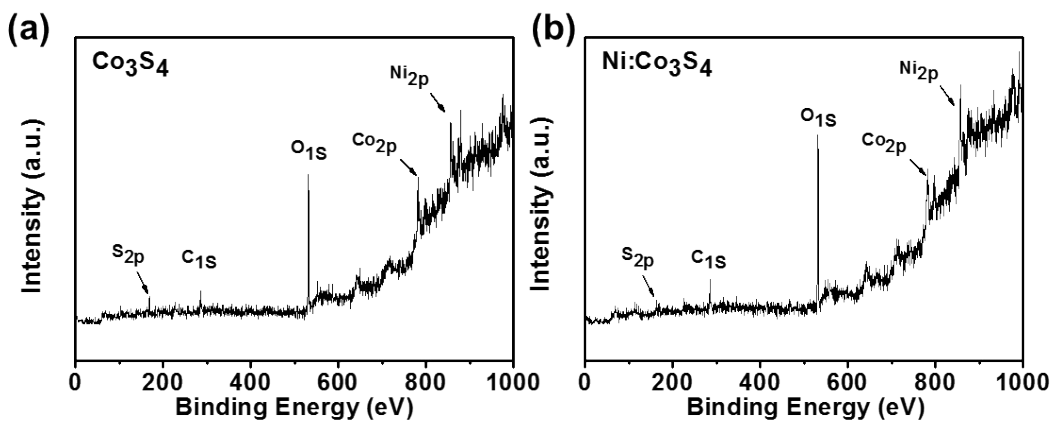

**Figure S1** XPS full survey results of the Co<sub>3</sub>S<sub>4</sub> and Ni:Co<sub>3</sub>S<sub>4</sub> samples.

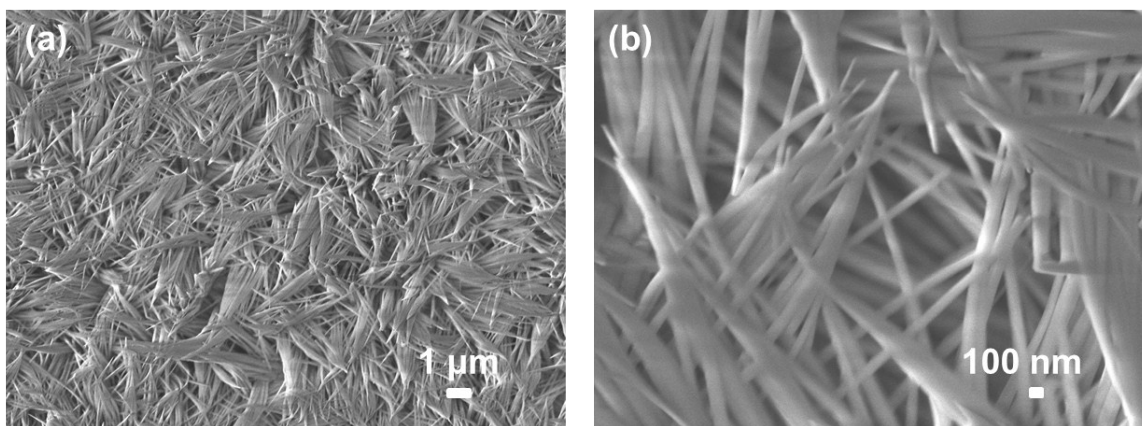

**Figure S2** Different magnification SEM images of the Co<sub>3</sub>O<sub>4</sub> precursor after the first hydrothermal method.

**Table S1** Atomic ratio of Ni:Co<sub>3</sub>O<sub>4</sub> and Ni:Co<sub>3</sub>S<sub>4</sub> materials determined by ICP-OES measurements.

| Material                           | Ni:Co <sub>3</sub> O <sub>4</sub> |              | Ni:Co <sub>3</sub> S <sub>4</sub> |               |
|------------------------------------|-----------------------------------|--------------|-----------------------------------|---------------|
|                                    | Ni                                | Co           | Ni                                | Co            |
| Element                            |                                   |              |                                   |               |
| Units                              | ppm                               | ppm          | ppm                               | ppm           |
| <b>Average</b>                     | <b>0.3085</b>                     | <b>3.069</b> | <b>0.0700</b>                     | <b>0.6880</b> |
| Stddev                             | 0.0015                            | 0.011        | 0.0002                            | 0.0008        |
| %RSD                               | 0.4893                            | 0.3435       | 0.2291                            | 0.1116        |
| <b>Average atom ratio of Ni:Co</b> | <b>10.05%</b>                     |              | <b>10.17%</b>                     |               |

**Table S2** Summary of OER and HER performance of the as-prepared Co-based catalysts in 1.0 M KOH electrolyte.

| Catalyst                          | Overpotential<br>@10 mA cm <sup>-2</sup> (mV) | Tafel slope<br>(mV dec <sup>-1</sup> ) | Overpotential<br>@10 mA cm <sup>-2</sup> (mV) | Tafel slope<br>(mV dec <sup>-1</sup> ) |
|-----------------------------------|-----------------------------------------------|----------------------------------------|-----------------------------------------------|----------------------------------------|
|                                   | OER                                           |                                        | HER                                           |                                        |
| Co <sub>3</sub> O <sub>4</sub>    | 371                                           | 69                                     | 221                                           | 110                                    |
| Co <sub>3</sub> S <sub>4</sub>    | 283                                           | 66                                     | 218                                           | 134                                    |
| Ni:Co <sub>3</sub> O <sub>4</sub> | 348                                           | 74                                     | 222                                           | 93                                     |
| Ni:Co <sub>3</sub> S <sub>4</sub> | 293                                           | 65                                     | 199                                           | 91                                     |

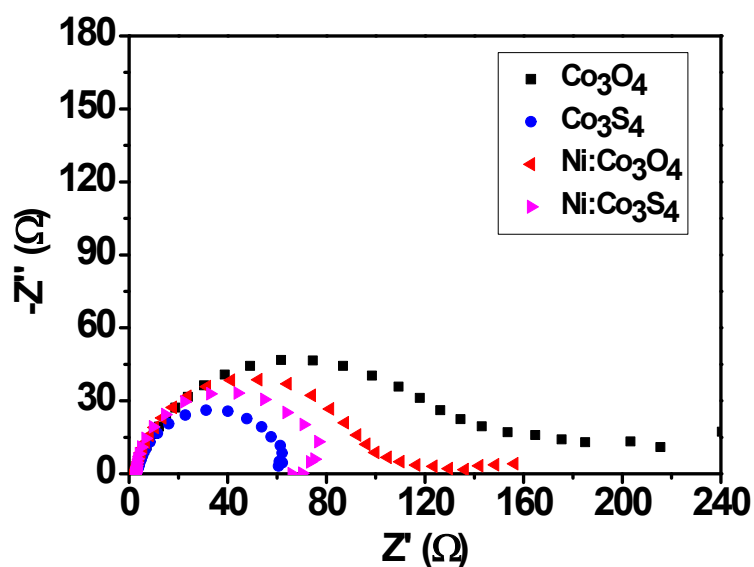

**Figure S3** Nyquist plots of cobalt-based catalysts in the frequency range from 100 kHz to 100 H. Impedance tests are performed in a three-electrode glass configuration in 1.0 M KOH electrolyte. These catalysts are used as working electrodes, a platinum foil as counter electrode, and an Ag/AgCl (3.0 M KCl) electrode as the reference electrode.

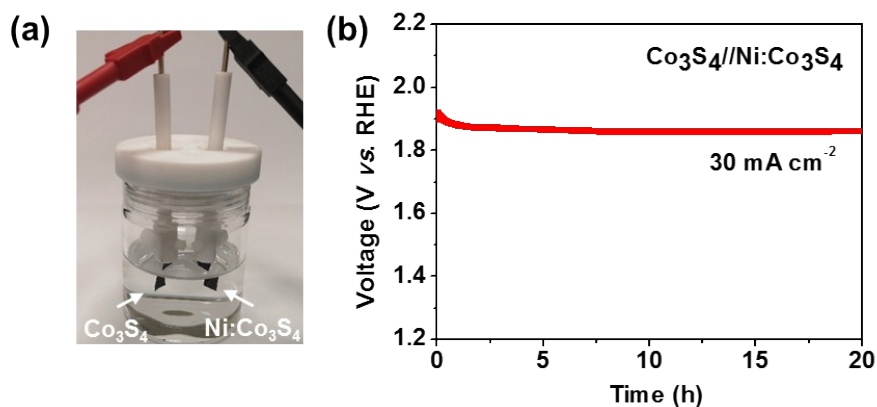

**Figure S4** (a) Overall water splitting tests in a two-electrode configuration with 1.0 M KOH as the electrolyte, where  $\text{Co}_3\text{S}_4$  acts as the OER electrode and  $\text{Ni}:\text{Co}_3\text{S}_4$  as the HER electrode (denoted as  $\text{Co}_3\text{S}_4//\text{Ni}:\text{Co}_3\text{S}_4$ ). (b) Stability test of above  $\text{Co}_3\text{S}_4//\text{Ni}:\text{Co}_3\text{S}_4$  system under a constant current density of  $30 \text{ mA cm}^{-2}$  (geometric area) for 20 hours.

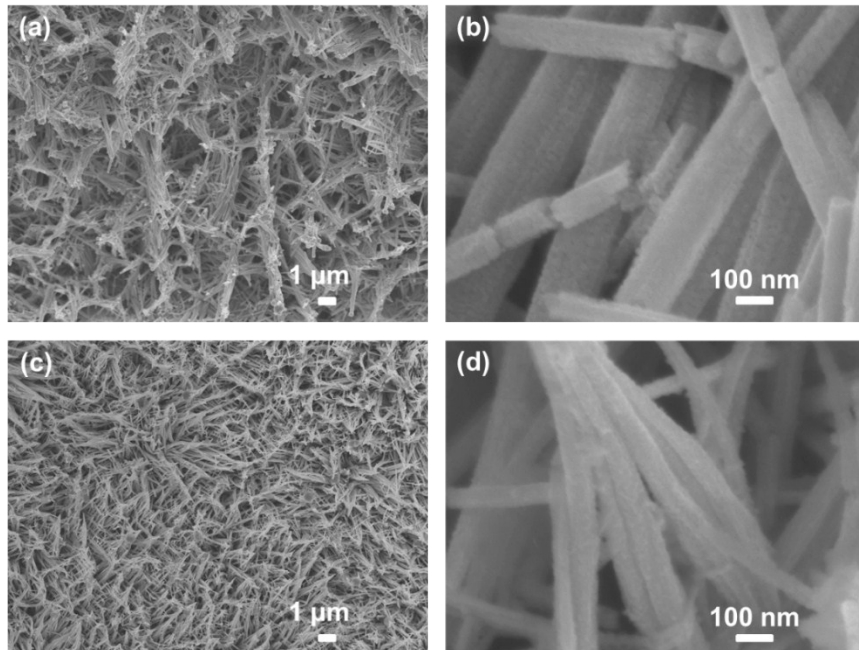

**Figure S5** SEM images of the morphology of (a-b) Co<sub>3</sub>S<sub>4</sub> nanowires (act as the OER electrode) and (c-d) Ni:Co<sub>3</sub>S<sub>4</sub> nanotubes (act as the HER electrode) after stability test for overall water splitting in 1.0 M KOH electrolyte under a constant current density of 30 mA cm<sup>-2</sup> for 20 hours.

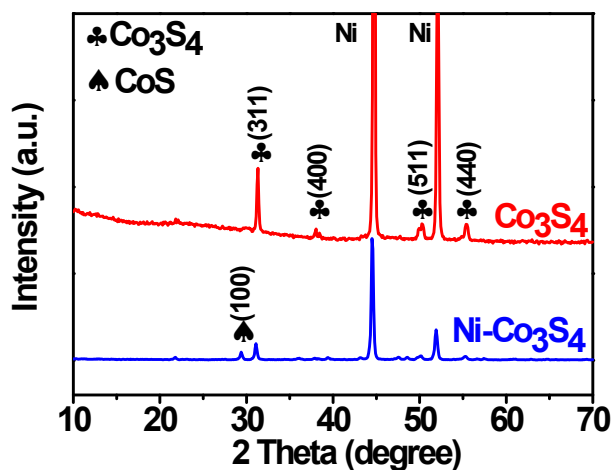

**Figure S6** XRD patterns of Co<sub>3</sub>S<sub>4</sub> (red line) and Ni:Co<sub>3</sub>S<sub>4</sub> (blue line) after stability test for overall water splitting in 1.0 M KOH electrolyte under 30 mA cm<sup>-2</sup> for 20 hours. ♣ denotes the peaks corresponding to the Co<sub>3</sub>S<sub>4</sub> (JCPDS 19-0367), and ♠ can be indexed to the CoS (JCPDS 70-2864).

**Table S3** Comparison of the OER performance of as-prepared our catalysts and reported Co-related catalysts

| Catalyst                                       | Overpotential<br>@10mA/cm <sup>2</sup> (mV) | Tafel slope<br>(mV dec <sup>-1</sup> ) | Substrate    | Electrolyte |
|------------------------------------------------|---------------------------------------------|----------------------------------------|--------------|-------------|
| Co <sub>3</sub> S <sub>4</sub> (our work)      | 283                                         | 66                                     | Ni foam      | 1.0 M KOH   |
| Ni: Co <sub>3</sub> S <sub>4</sub> (our work)  | 293                                         | 65                                     | Ni foam      | 1.0 M KOH   |
| CoN <sup>7</sup>                               | 290                                         | 70                                     | Ni foam      | 1.0 M KOH   |
| Co <sub>4</sub> N <sup>8</sup>                 | 257                                         | 44                                     | Carbon cloth | 1.0 M KOH   |
| Co <sub>2</sub> B <sup>9</sup>                 | 380                                         | 45                                     | Powder       | 3.0 M KOH   |
| CoS <sup>10</sup>                              | 306                                         | 72                                     | Carbon paper | 1.0 M KOH   |
| NiCo <sub>2</sub> S <sub>4</sub> <sup>11</sup> | 260                                         | 40                                     | Ni foam      | 1.0 M KOH   |
| IrO <sub>2</sub> <sup>11</sup>                 | 340                                         | 72.5                                   | Ni foam      | 1.0 M KOH   |
| S-Co/CNS <sup>12</sup>                         | 320                                         | 52.3                                   | Powder       | 1.0 M KOH   |

**Table S4** Summary of the electrochemical activities of the catalytic electrodes for overall water splitting

| Catalyst                                                                                 | V <sub>total</sub> @10mA/cm <sup>2</sup> | Durability | Substrate    | Electrolyte |
|------------------------------------------------------------------------------------------|------------------------------------------|------------|--------------|-------------|
| Co <sub>3</sub> S <sub>4</sub> // Ni:Co <sub>3</sub> S <sub>4</sub> (our work)           | 1.70 V                                   | 40 h       | Ni foam      | 1.0 M KOH   |
| Co <sub>2</sub> B // Co <sub>2</sub> B <sup>9</sup>                                      | 1.81 V                                   | -          | Powder       | 3.0 M KOH   |
| Co-S // Co-S <sup>10</sup>                                                               | 1.74 V                                   | 2 h        | Carbon paper | 1.0 M KOH   |
| NiCo <sub>2</sub> S <sub>4</sub> NW // NiCo <sub>2</sub> S <sub>4</sub> NW <sup>11</sup> | 1.63 V                                   | 50 h       | Ni foam      | 1.0 M KOH   |
| Ni <sub>3</sub> S <sub>4</sub> // Ni <sub>3</sub> S <sub>4</sub> <sup>11</sup>           | 1.73 V                                   | -          | Ni foam      | 1.0 M KOH   |
| NiS // NiS <sup>13</sup>                                                                 | 1.64 V                                   | 35 h       | Ni foam      | 1.0 M KOH   |
| NiCo <sub>2</sub> S <sub>4</sub> // NiCo <sub>2</sub> S <sub>4</sub> <sup>14</sup>       | 1.68 V                                   | 10 h       | Carbon cloth | 1.0 M KOH   |
| NiCo <sub>2</sub> O <sub>4</sub> // NiCo <sub>2</sub> O <sub>4</sub> <sup>14</sup>       | 1.98 V                                   | -          | Carbon cloth | 1.0 M KOH   |
| CoNi(OH) <sub>x</sub> // NiN <sub>x</sub> <sup>15</sup>                                  | 1.65 V                                   | -          | Cu foil      | 1.0 M KOH   |



## 2. Computational Models and Methods

Spin-polarized DFT calculations have been performed using the full-potential all-electron code FHI-aims<sup>1</sup> at the level of the generalized gradient approximation (GGA) in the Perdew-Burke-Ernzerhof (PBE) parameterization.<sup>2</sup> A pre-constructed high-accuracy all-electron basis set of numerical atomic orbitals was employed, as provided by the FHI-aims default option. Structural optimization was performed with a tolerance of  $10^{-3}$  eV/Å. All geometries and energies reported herein correspond to the optimal spin state for each system.  $\text{Co}_3\text{O}_4$  adopts the normal spinel structure with  $\text{Co}^{2+}$  ( $\text{Co}^{3+}$ ) ions located in the tetrahedral (octahedral) sites of the face centered cubic lattice formed by  $\text{O}^{2-}$  anions. The effects of the coverage on the catalytic activities have been discussed by García-Mota *et al.*<sup>3</sup> and Zhang *et al.*<sup>4</sup> for the cobalt oxide systems. Surfaces with coverage of O/OH are reported to be more active than the clean surface. Therefore, half-monolayer OH covered surface model is used for the oxygen-poor A termination. For the oxygen-rich B termination, a clean surface model is used.

In this study, the adsorption energy ( $\Delta E_{\text{ads}}$ ) for  $\text{H}^*$ ,  $\text{OOH}^*$ ,  $\text{O}^*$ , and  $\text{OH}^*$  were calculated by the following equations:

$$\Delta E_{\text{H}^*} = E(\text{H}^*) - E(^*) - 1/2E_{\text{H}_2} \quad (1)$$

$$\Delta E_{\text{OOH}^*} = E(\text{OOH}^*) - E(^*) - (2E_{\text{H}_2\text{O}} - 3/2E_{\text{H}_2}) \quad (2)$$

$$\Delta E_{\text{O}^*} = E(\text{O}^*) - E(^*) - (E_{\text{H}_2\text{O}} - E_{\text{H}_2}) \quad (3)$$

$$\Delta E_{\text{OH}^*} = E(\text{OH}^*) - E(^*) - (E_{\text{H}_2\text{O}} - 1/2E_{\text{H}_2}) \quad (4)$$

Where  $^*$  and  $\text{X}^*$  denotes surfaces and adsorbed X species, respectively. The energies of isolated molecules ( $\text{H}_2$ ,  $\text{H}_2\text{O}$ ,  $\text{O}_2$ ) were computed in an orthorhombic cell of dimensions  $10 \text{ \AA} \times 11 \text{ \AA} \times 12 \text{ \AA}$ . The OER energy profile were constructed based on the model developed by Nørskov.<sup>5</sup> In the scheme, the OER is assumed to involve four elementary reaction steps and each step involves electron transfer of an electron to the electrode and a proton to water:

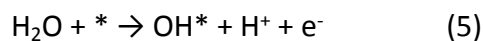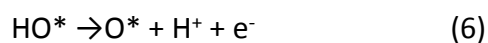

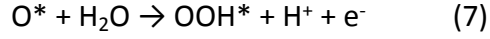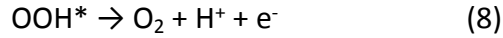

Based on the computational hydrogen electrode model,<sup>5</sup> the free energy change along the OER processes ( $\Delta G_n$ ,  $n = 1-4$ ) at standard conditions can be derived as:

$$\Delta G_1 = \Delta G_{\text{OH}^*} \quad (9)$$

$$\Delta G_2 = \Delta G_{\text{O}^*} - \Delta G_{\text{OH}^*} \quad (10)$$

$$\Delta G_3 = \Delta G_{\text{OOH}^*} - \Delta G_{\text{O}^*} \quad (11)$$

$$\Delta G_4 = 4.92 - \Delta G_{\text{OOH}^*} \quad (12)$$

Then the theoretical overpotentials ( $\eta$ ) for OER can be calculated using the equations:

$$\eta = \max \{\Delta G_1, \Delta G_2, \Delta G_3, \Delta G_4\} / e - 1.23 \text{ (V)} \quad (13)$$

The adsorption energy of a single H atom ( $\Delta G_{\text{H}^*}$ ) is usually considered as an effective descriptor for evaluating the hydrogen evolution reaction (HER) activity over a given system.<sup>6</sup> Generally, the smaller ( $\Delta G_{\text{H}^*}$ ) absolute value, the better the HER activity.  $\Delta G_{\text{H}^*}$  can be calculated by:

$$\Delta G_{\text{H}^*} = \Delta E_{\text{H}^*} + \Delta \text{ZPE} - T\Delta S \quad (14)$$

Where  $\Delta E_{\text{H}^*}$  is the binding energy,  $\Delta \text{ZPE}$  is the zero-point energy (ZPE) difference and  $\Delta S$  is the entropy change of  $\text{H}^*$ . The ZPE of H atom in different state (gas and adsorbed state) are very similar, thus  $\Delta \text{ZPE}$  is close to zero. The entropy of hydrogen in adsorbed state is negligible, and  $T\Delta S$  is calculated based on the entropy of  $\text{H}_2$  in the gas phase.  $T\Delta S$  is determined to be -0.21 eV.

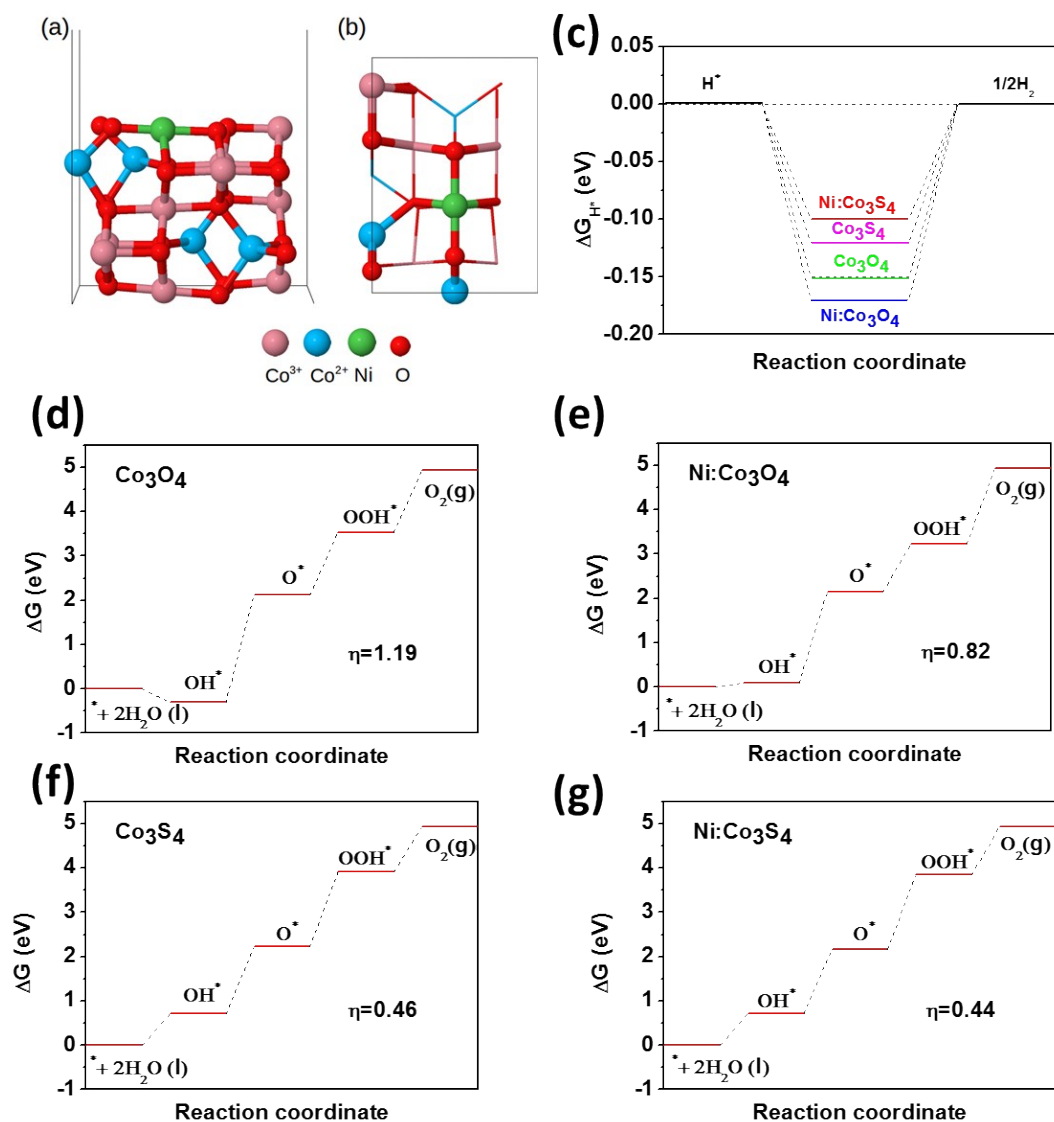

**Figure S7** (a) Side view and (b) top view of the B termination of Ni:Co<sub>3</sub>O<sub>4</sub> (110) surface. In the top view of the structure, the atoms at the top layer are illustrated by ball-and-stick models, and the rest of the atoms are given by line models. Co<sup>3+</sup>, Co<sup>2+</sup>, Ni, and O atoms are shown in pink, blue, green and red, respectively. (c) Calculated free energy diagram for the HER process on the B termination of four catalysts. Calculated free energy diagram for the OER process on the B termination of Co<sub>3</sub>O<sub>4</sub> (d), Ni:Co<sub>3</sub>O<sub>4</sub> (e), Co<sub>3</sub>S<sub>4</sub> (f), and Ni:Co<sub>3</sub>S<sub>4</sub> (g) and the corresponding theoretical overpotential.

### 3. References

1. V. Blum, R. Gehrke, F. Hanke, P. Havu, V. Havu, X. Ren, K. Reuter and M. Scheffler, *Computer Physics Communications*, 2009, **180**, 2175-2196.
2. J. P. Perdew, K. Burke and M. Ernzerhof, *Physical Review Letters*, 1996, **77**, 3865-3868.
3. M. García-Mota, M. Bajdich, V. Viswanathan, A. Vojvodic, A. T. Bell and J. K. Nørskov, *The Journal of Physical Chemistry C*, 2012, **116**, 21077-21082.
4. P. Zhang, Y. Dong, Y. Kou, Z. Yang, Y. Li and X. Sun, *Catalysis Letters*, 2015, **145**, 1169-1176.
5. J. K. Nørskov, J. Rossmeisl, A. Logadottir, L. Lindqvist, J. R. Kitchin, T. Bligaard and H. Jónsson, *The Journal of Physical Chemistry B*, 2004, **108**, 17886-17892.
6. J. K. Nørskov, T. Bligaard, A. Logadottir, J. R. Kitchin, J. G. Chen, S. Pandelov and U. Stimming, *Journal of The Electrochemical Society*, 2005, **152**, J23.
7. Y. Zhang, B. Ouyang, J. Xu, G. Jia, S. Chen, R. S. Rawat and H. J. Fan, *Angewandte Chemie*, 2016, **55**, 8670-8674.
8. P. Chen, K. Xu, Z. Fang, Y. Tong, J. Wu, X. Lu, X. Peng, H. Ding, C. Wu and Y. Xie, *Angewandte Chemie*, 2015, **54**, 14710-14714.
9. J. Masa, P. Weide, D. Peeters, I. Sinev, W. Xia, Z. Sun, C. Somsen, M. Muhler and W. Schuhmann, *Advanced Energy Materials*, 2016, **6**, 1502313.
10. J. Wang, H. X. Zhong, Z. L. Wang, F. L. Meng and X. B. Zhang, *ACS Nano*, 2016, **10**, 2342-2348.
11. A. Sivanantham, P. Ganesan and S. Shanmugam, *Advanced Functional Materials*, 2016, **26**, 4661-4672.
12. M. Al-Mamun, Z. Zhu, H. Yin, X. Su, H. Zhang, P. Liu, H. Yang, D. Wang, Z. Tang, Y. Wang and H. Zhao, *Chemical communications*, 2016, **52**, 9450-9453.
13. W. Zhu, X. Yue, W. Zhang, S. Yu, Y. Zhang, J. Wang and J. Wang, *Chemical communications*, 2016, **52**, 1486-1489.
14. D. Liu, Q. Lu, Y. Luo, X. Sun and A. M. Asiri, *Nanoscale*, 2015, **7**, 15122-15126.
15. S. Li, Y. Wang, S. Peng, L. Zhang, A. M. Al-Enizi, H. Zhang, X. Sun and G. Zheng, *Advanced Energy Materials*, 2016, **6**, 1501661.
